# Supplementary material for: The helicase domain of human Dicer prevents RNAi-independent activation of antiviral and inflammatory pathways
Source: PubMed Central journal article supplement (PMC10907635; doi:10.1038/s44318-024-00035-2), 2024-01-29
Supplement: 44318_2024_35_MOESM1_ESM.pdf [file 44318_2024_35_MOESM1_ESM.pdf]

# Appendix

## **The helicase domain of human Dicer prevents RNAi-independent activation of antiviral and inflammatory pathways**

Morgane Baldaccini, Léa Gaucherand, Béatrice Chane-Woon-Ming, Mélanie Messmer, Floriane Gucciardi, Sébastien Pfeffer\*

### Table of Contents

|                           | Page |
|---------------------------|------|
| <b>Appendix Figure S1</b> | 2    |
| <b>Appendix Figure S2</b> | 3    |
| <b>Appendix Figure S3</b> | 4    |
| <b>Appendix Figure S4</b> | 5    |
| <b>Appendix Table S1</b>  | 6    |

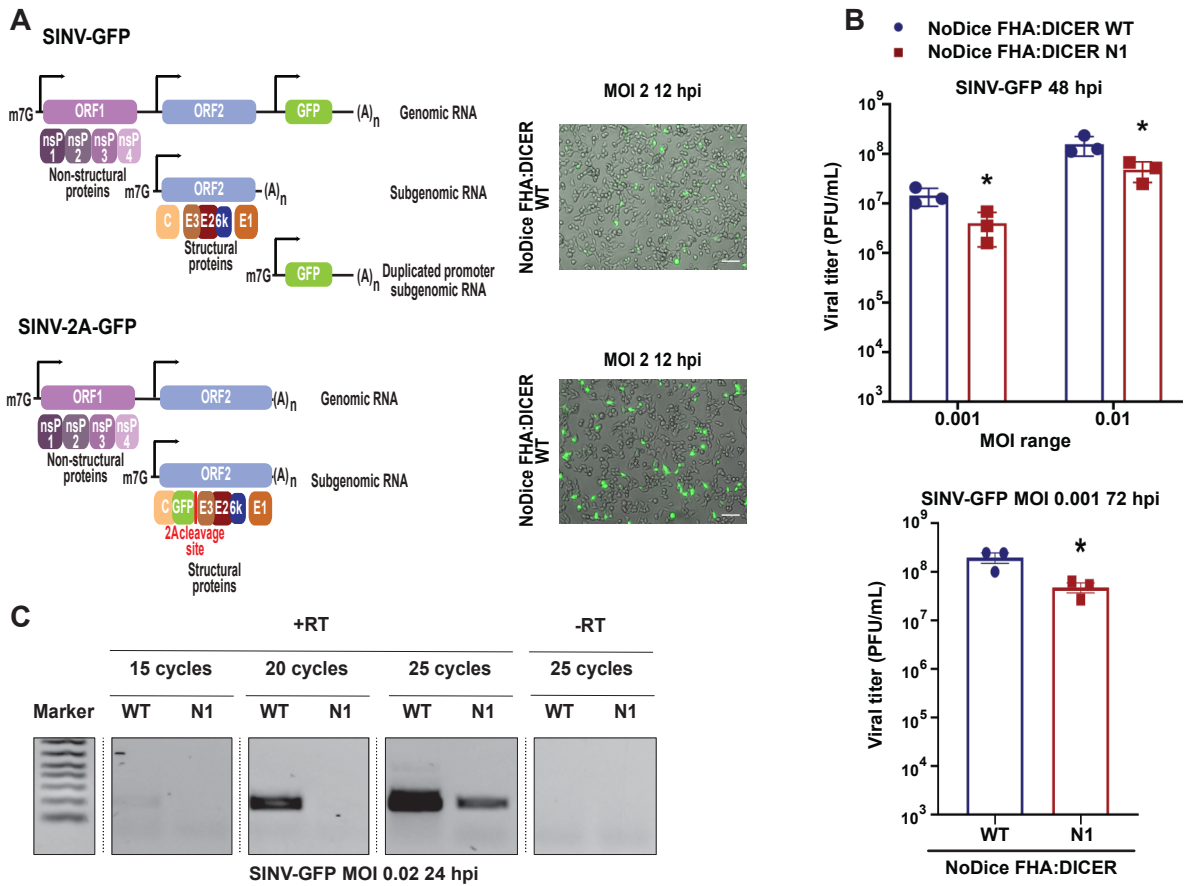

**Appendix Figure S1.** Dicer N1 reduces SINV replication at longer infection times and decreases antigenome production.

**A.** Schematic representation of SINV-GFP and SINV-2A-GFP genome organization and representative fluorescent pictures of GFP expressed by the two viruses upon infection of NoDice FHA:DICER WT cells at an MOI of 2 for 12h. Scale bar = 50 $\mu$ m, (n = 3 biological replicates). ORF: Open reading frame, nsP: non-structural proteins, C: capsid, E1 to E3: envelope proteins.

**B.** Mean (+/- SEM) SINV-GFP viral titer in NoDice FHA:DICER WT and N1 infected at an MOI 0.001 and 0.01 for 48h (up) and 0.001 for 72h (bottom) from plaque assay quantification (n = 3 biological replicates). Upper panel: ordinary two-way ANOVA test with Sidak's correction. \*: p < 0.05. Bottom panel: Unpaired t-test. \*: p < 0.05.

**C.** Agarose gel of RT-PCR on SINV antigenome in SINV-GFP infected NoDice FHA:DICER WT and N1 cells at an MOI of 0.02 for 24h (n = 3 biological replicates).

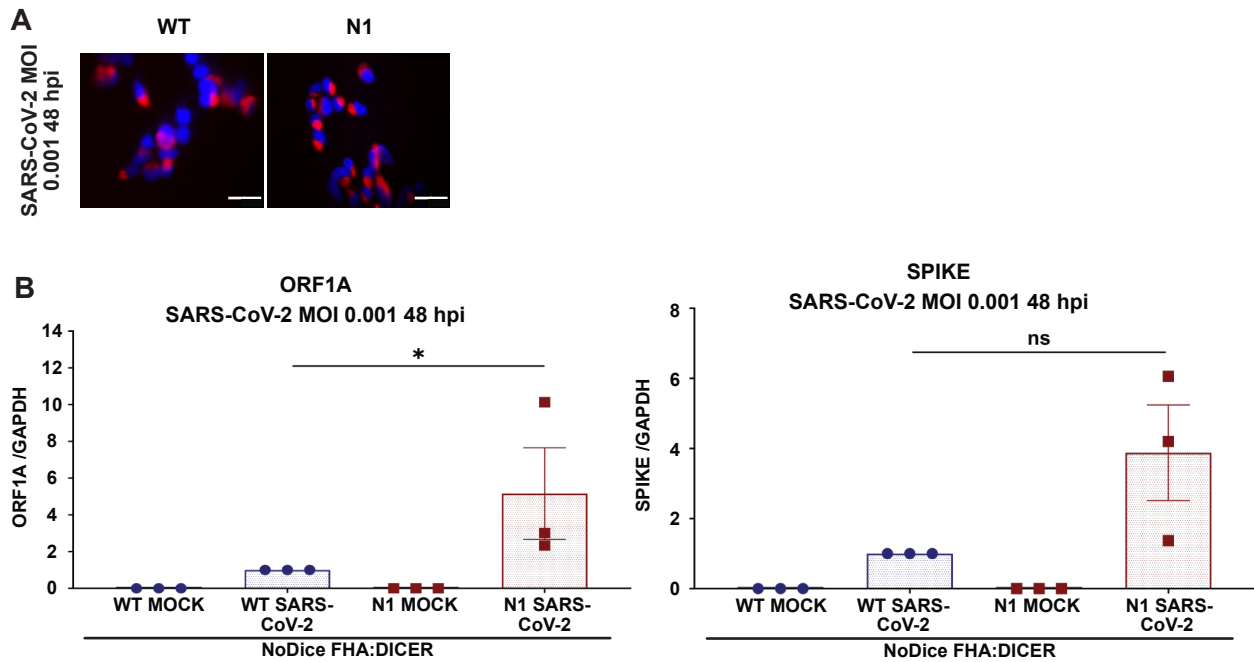

**Appendix Figure S2.** Dicer N1 enhances SARS-CoV-2 replication.

**A.** Immunofluorescence analysis on NoDice FHA:DICER WT and N1 cells in SARS-CoV-2 infected cells at an MOI of 0.001 for 48h. J2 antibody (red) was used to detect dsRNA upon infection. DAPI was used to stain the nuclei (blue). Scale bar = 100  $\mu$ m, (n = 3 biological replicates).

**B.** RT-qPCR on SARS-CoV-2 genome (ORF1A and SPIKE) in NoDice FHA:DICER WT and N1 cells infected with SARS-CoV-2 at an MOI of 0.001 for 48h. Mean (+/-SEM); n = 3 biological replicates. Unpaired t-test. \*:  $p < 0.05$ ; ns: non-significant.

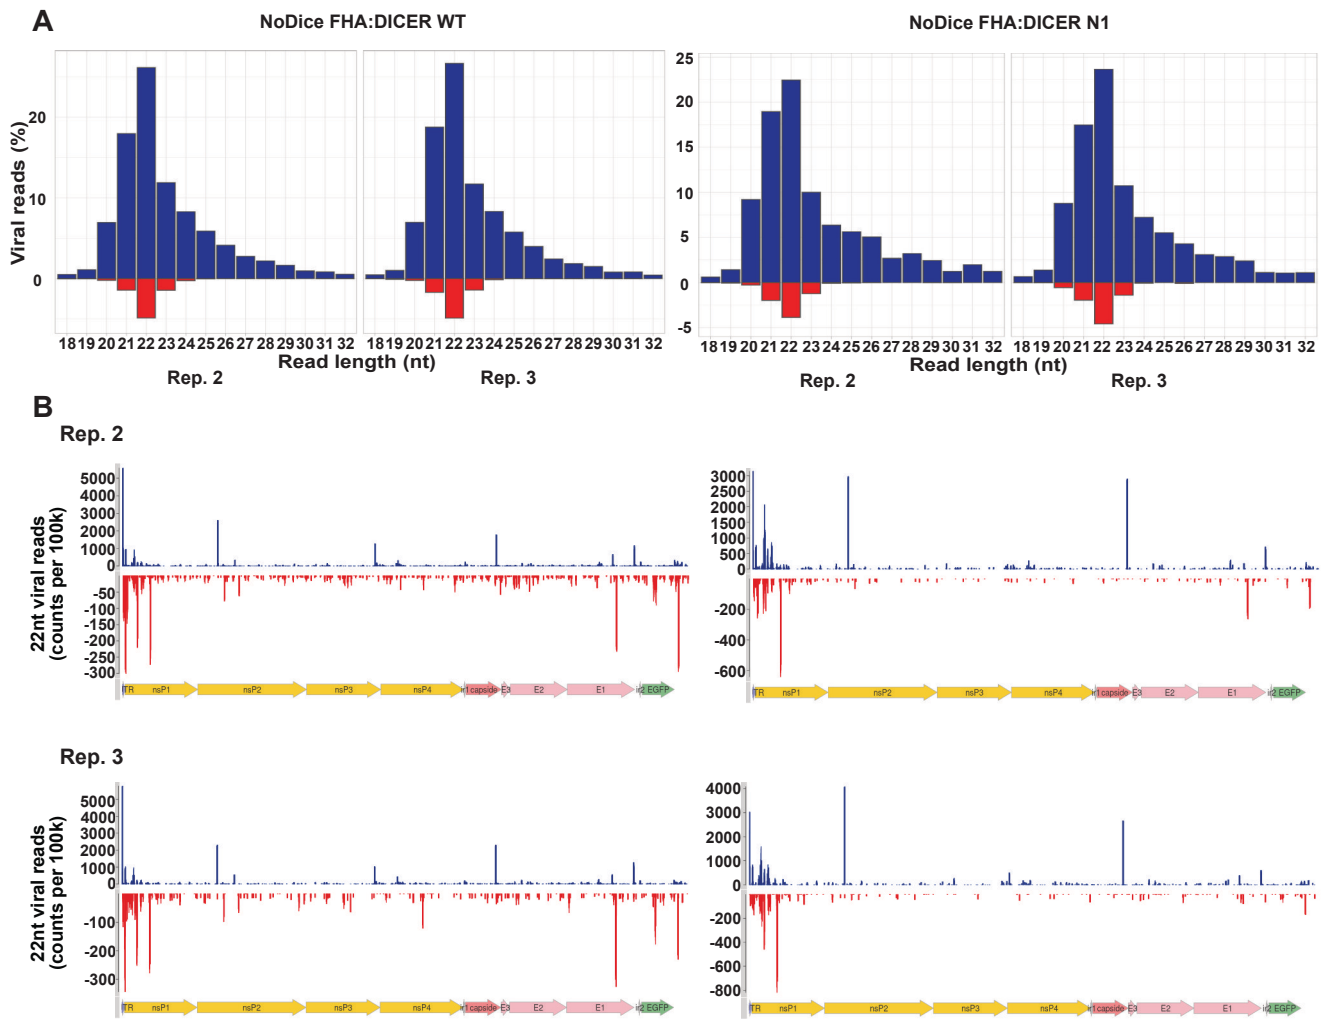

**Appendix Figure S3.** Dicer N1 cells do not accumulate more virus-derived small RNAs than Dicer WT cells.

**A.** Representative histograms of the distribution of viral reads (in percent) per RNA length upon small RNA sequencing for replicates 2 and 3 in NoDice FHA:DICER WT (left) and N1 (right) cells infected with SINV-GFP at an MOI of 0.02 for 24h. Blue: positive strand; red: negative strand.

**B.** Representative graphs of the mapping of 22-nt-reads on SINV-GFP genome for replicates 2 and 3 in NoDice FHA:DICER WT (left) and N1 (right) cells.

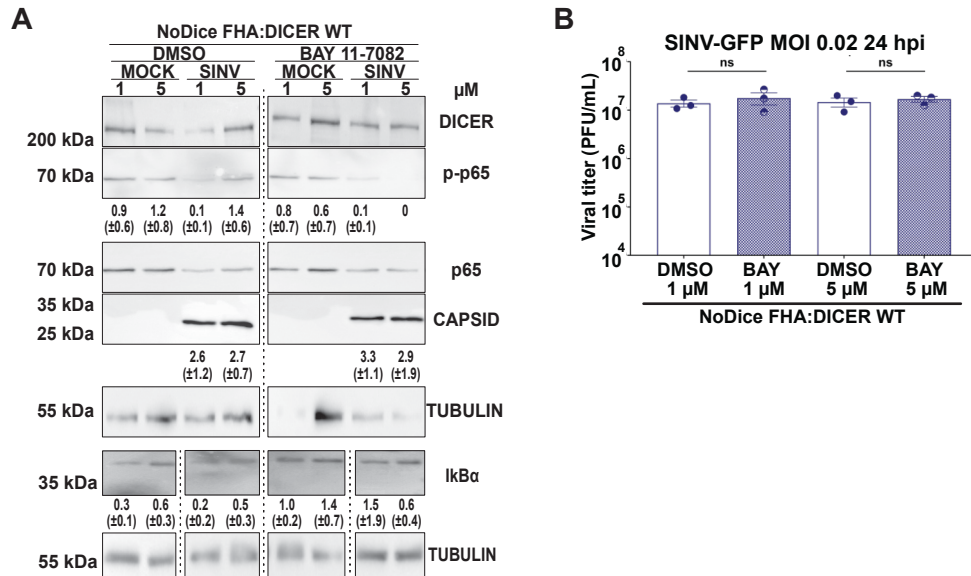

**Appendix Figure S4.** NF-κB/p65 is not involved in the infection outcome in Dicer WT cells.

**A.** Western blot analysis of DICER, p-p65, p65, CAPSID and IkBα expression in SINV-GFP infected NoDice FHA:DICER WT cells at an MOI of 0.02 for 24h. Before infection, cells were treated with the NF-κB/p65 inhibitor, BAY 11-7082 or the vehicle (DMSO) at the indicated concentrations for 1 h. Alpha-Tubulin was used as loading control. Mean (+/- SD) of bands quantification of three independent replicates normalized to Tubulin are represented under the corresponding lane; p-p65 = p-p65/p65 quantification.

**B.** Mean (+/- SEM) of SINV-GFP viral titers in the same samples as in 1, infected at an MOI of 0.02 for 24h (n = 3 biological replicates) from plaque assay quantification. Ordinary one-way ANOVA test with Sidak's correction. ns: non-significant.

**Appendix Table S1.** List of oligonucleotides used in this study.

| Type                        | Target              | Fw                                             | Rev                                   |
|-----------------------------|---------------------|------------------------------------------------|---------------------------------------|
| PCR primers for mutagenesis | PKR K296R           | CGTTATTAGACGTGTAAATATAATAACGAGAAGG             | ACACGTCTAATAACGTAAGTCTTTCCG           |
|                             | PKR T451A           | TAAGGGAGCATTGCGATACATGAGCCCAGAAC               | CGCAATGCTCCCTTACTCCTTGTTGCGCTTTCC     |
|                             | MYC EMPTY           | AGGATCTGACCCAGCTTTCTTGACAAAGTGG                | GCTGGGTCAGATCCTCTTCTGAGATGAGTTT       |
|                             | N1-CM               | ACCAATTCAGTCGACATGGAAGCAGAATTC                 | GAATTCTGCTTCCATGTCGACTGAATTGGT        |
|                             | ΔHEL1               | CGCCAAGAAAATATCAGGTTAGTAATGCTGAAACTGC          | GTTGCAGTTTCAGCATTACTAACCTGATATTTTCTTG |
|                             | ΔHEL2i              | TTAGACAGAAATTTTCTTCTCCTTTTACCAAC               | AAAATTTCTGTCTAAGACCACCAGGTCAG         |
|                             | ΔHEL2               | CAGAGACACCTGTCATGGATGATGATCACG                 | TGACAGGTGTCTCTGGCTTCTTTTTTCTTC        |
| RT-PCR primers              | RT specific SINV    | ATTGACGGCGTAGTACACACTATTGAATCAAACAGCC<br>GACCA | /                                     |
|                             | PCR SINV antigenome | TAGACGTAGACCCCCAGAGTC                          | CATTCTACGAGCCGGTGCGC                  |
| qPCR primers                | SINV genome         | CCACTACGCAAGCAGAGACG                           | AGTGCCAGGGCCTGTGTCCG                  |
|                             | GAPDH               | CTTTGGTATCGTGGAAGGACT                          | CCAGTGAGCTTCCCGTTCAG                  |
|                             | OAS3                | TGCTGCCAGCCTTTGACGCC                           | TCGCCCGCATTGCTGTAGCTG                 |
|                             | PTGS2               | ACCCACTCAAACACAGTGC                            | GCTTCCCAGCTTTTGTAGCC                  |
|                             | APOBEC3B            | GACCCTTTGGTCCTTCGAC                            | GCACAGCCCCAGGAGAAG                    |
|                             | MX1                 | AAGCTGATCCGCCTCCACTT                           | TGCAATGCACCCCTGTATACC                 |
|                             | IFN β               | AAGGCCAAGGAGTACAGTC                            | ATCTTCAGTTTVGGAGGTAA                  |
|                             | IFIT3               | ATGAGTGAGGTCACCAAGAATTCCC                      | GGCTGCCTCGTTGTTACCAT                  |
| Northern blot probes        | miR-16              | CGCCAATATTTACGTGCTGCTA                         |                                       |
|                             | U6                  | GCAGGGGCCATGCTAATCTTCTCTGTATCG                 |                                       |
